# Supplementary material
Source: publisher site journal article supplement (https://www.dovepress.com/article/242780)
Supplement: Supplementary file 1 [file get_supplementary_file.php]

Supplementary table 1. Test for proportional hazard assumptions

| Independent variables | p-value |
| --- | --- |
| Age | 0.9317 |
| Gender | 0.4722 |
| Stage | 0.4351 |
| Multiple lesions | 0.9991 |
| Location | 0.0826 |
| Radical treatment | 0.1060 |
| Active treatment lines | 0.7764 |
| First PFS | 0.4973 |
